# Supplementary material
Source: Springer Nature journal article supplement (http://springerprofessional.de/resource/supplementary/40702_2023_996_MOESM1_ESM.pdf/25950804)
Supplement: MOESM1 [file 25950804]

# **Künstliche Intelligenz zur Entscheidungsunterstützung in Leitstellen des Personennahverkehrs – Technische und sozio-technische Herausforderungen**

*- Ergänzendes Online-Material zur Datenevidenz -*

**Tobias Kopp<sup>1\*</sup>, Robin Weitemeyer<sup>1</sup>, Jens Beyer<sup>2</sup>, Dominic Ziegler<sup>3</sup>, Roxana Hess<sup>3</sup>**

<sup>1</sup>Institut für Lernen und Innovation in Netzwerken, Hochschule Karlsruhe, Moltkestr. 30, 76133 Karlsruhe.

<sup>2</sup>Lavrio Solutions, Roonstraße 23a, 76137 Karlsruhe

<sup>3</sup>INIT Innovative Informatikanwendungen in Transport-, Verkehrs- und Leitsystemen GmbH, Käppelestraße 4–10, 76131 Karlsruhe.

**\* Correspondence:**

Tobias Kopp  
tobias.kopp@h-ka.de

In diesem ergänzenden Online-Material zu o.g. Artikel wird nachfolgend dessen empirische Grundlage und die verwendete Methodik näher beschrieben.

Die empirische Arbeit gliederte sich in drei Phasen.

## **Phase 1: Expert:inneninterviews**

- Teilnehmer:innen:
  - drei Personen (Disponent:innen, unterschiedlicher Erfahrungsstufen)
  - aus zwei deutschen Verkehrsbetrieben
- Dauer: je 1,5 Stunden
- Qualitative Interviews:
  - Auf Basis eines eigens entwickelten detaillierten Leitfadenfragebogens
  - Situativ ergänzende offene Fragen

## **Phase 2: Expert:innengespräch**

- Teilnehmer:in:
  - eine Person (ehemalige:r Disponent:in mit langjähriger Erfahrung)
  - aus einem deutschen Verkehrsbetrieb
- Dauer: 4 Stunden
- Qualitatives Interview:
  - Offene Fragen
  - Live-Demo zu aktuell im Einsatz befindlichen Systemen und deren Verwendung

### **Phase 3: Workshop**

- Teilnehmer:innen:
  - acht Personen (Mitarbeitende/Leitung von Verkehrsleitstellen)
  - aus fünf deutschen und einem niederländischen Verkehrsbetrieb
- Aufbau:
  - Workshop:
    - zwei Gruppen je vier Personen
    - Dauer: 0,5 Stunden
    - Offene Fragen
    - Bearbeitung von Fragestellungen, die aus den bisherigen Erkenntnissen abgeleitet wurden
  - Feedback-Runde:
    - Präsentation der bisherigen Erkenntnisse aus den vorangegangenen Phasen
    - Feedback der Teilnehmer:innen zum bisherigen Vorgehen und der geplanten KI-Anwendung
